# Supplementary material for: Farm to Families: Clinic-based Produce Provision to Address Food Insecurity During the Pandemic
Source: Oxford University Press journal article supplement (doi:10.1542/peds.2022-057118), 2022-09-22
Supplement: peds_2022057118supplementarydata1.pdf [file peds_2022057118supplementarydata1.pdf]

## Supplemental Information

### Clinic-based Produce Provision to Address Food Insecurity During the Pandemic

#### Qualitative Interview Script

#### First, let's talk about your experience with this produce program at CHOP.

Tell me about your experience with the Farm to Families program at CHOP that provided you with a box of produce.

Prompts:

- What did you like?
- What would make it better?
- What didn't you like?

How did you feel about getting a box of produce at a doctor's visit?

Prompts:

- How did being at the doctor's office change your comfort level?
- How did you feel about the location?

How did you feel about the size and weight of the box that you received?

Prompts:

- How was it to carry this produce home?
- What would have made it easier/better?

What did you think of the food that was included in the produce box?

Prompts:

- What foods did you and your family use?
- How long did it take for this produce to run out?
- What foods did you not use? Why?
- What did you do with the foods you did not use?

- Is there anything that you wish had been in the box?
- What about foods other than fruits and vegetables (ie, meats, eggs, jams, cheese)?
- What would make the produce box better?

How do you feel that this box has affected your diet, if at all?

Prompts:

- How will this change your shopping patterns?

How would you feel about participating in this program if there were a cost per box of produce?

Prompts:

- What do you think would be a reasonable price?
- How often would you want a box?
- Where would you want to get the box?
- How would you feel about an option to have the produce delivered to your home?
- How important is this option?

#### We know that the COVID-19 pandemic has made many things difficult for families. We'd like to hear about your experiences with food in general during this difficult time.

How has the pandemic changed your ability to get enough food for your family?

Prompts:

- What makes it easier/harder?
- Family supports?
- Store closures?
- Changes to food programs/benefits?
- Fear of virus?

- Low stock in stores?
- Changes in the price of food?
- Availability of child care?
- Changes in household income?
- Going through food faster?
- Are there certain types of foods that are easier/harder to get?
- Produce?

Tell me about your experience with WIC and/or SNAP benefits during this time.

Prompts:

- Have there been changes to your benefits?
- Are benefits easier/harder to use?

What other types of food programs have you used during this time?

Prompts:

- What made you choose these programs?
- Timing?
- Location?
- Dietary needs?
- Programs that serve a specific population: veteran, kids, seniors, special needs?
- Safety precautions?
- How did you hear about these programs?

How has the coronavirus pandemic changed which programs you use?

Prompts:

- In what ways is it easier or harder to use these programs?
- Location/transportation?
- Services provided?
- Have you used any new programs since the pandemic began?

Tell me about food programs that you'd like to use but haven't.

Prompts:

- Why haven't you used them?
- How do other things in your life affect your use of programs?
- What would make it easier?

What other types of programs would be useful to you?

Optional offer:

Text the word "food" to 877-877 to find free meal sites near you!

Visit [CommunityResourceConnects.org](http://CommunityResourceConnects.org) for additional help with food, utilities, child care, taxes, and more.

Call 215-430-0556 for free, confidential service to check your eligibility and sign up for SNAP (food stamps), get help with

problems with your benefits, and find pantries and other food programs in your area.

Is there anything else that you would like to share with us today?

Thank you for taking the time to talk. We will text message you a \$25 gift card in the next few weeks. Is this the best phone number to use?
